# Supplementary material for: Eretmapodites mosquitoes are potential bridge vectors for arboviruses in western Côte d’Ivoire
Source: Research Square preprint supplement (doi:10.21203/rs.3.rs-6526985/v1), 2025-05-13
Supplement: Supplementary file 1 [file 9211ae99ae8e0e2c40b321c3.docx]

**Additional File**

**Eretmapodites mosquitoes are potential bridge vectors for arboviruses in western Côte d’Ivoire**

Silvan Hälg1,2, Zonzéréké Coulibaly3,4, Christian Beuret5, Julien Z. B. Zahouli3,4, Pie Müller1,2

1 Swiss Tropical and Public Health Institute, Allschwil, Switzerland

2 University of Basel, Basel, Switzerland

3 Centre Suisse de Recherches Scientifiques en Côte d’Ivoire, Abidjan, Côte d’Ivoire

4 Centre d’Entomologie Médicale et Vétérinaire, Université Alassane Ouattara, Bouaké, Côte d’Ivoire

5 Labor Spiez, Spiez, Switzerland

*Correspondance: silvan.healg@swisstph.ch

| **New category** | **Species included** |
| --- | --- |
| ***Aedes aegypti*** | kept separate, high count |
| ***Aedes* spp. (rare) (<45)** | *Aedes cumminsii, Aedes dendrophilus, Aedes furcifer, Aedes grahami, Aedes lilii, Aedes longipalpis, Aedes palpalis, Aedes usambara, Aedes vittatus* |
| ***Anopheles* spp.** | *Anopheles coustani, Anopheles gambiae, Anopheles paludis, Anopheles pharoensis, Anopheles squamosus, Anopheles ziemani* |
| ***Coquillettidia* spp.** | *Coquillettidia aurites, Coquillettidia metallica* |
| ***Culex quinquefasciatus*** | kept separate, high count |
| ***Culex* spp. (rare) (<45)** | *Culex annulioris, Culex decens, Culex nebulosis* |
| ***Eretmapodites fraseri*** | kept separate, high count |
| ***Eretmapodites quinquevittatus*** | kept separate, high count |
| ***Eretmapodites* spp. (rare) (<45)** | Eretmapodites oedipodeios |
| ***Mansonia* spp.** | *Mansonia africana, Mansonia metallica, Mansonia uniformis* |
| ***Uranotaenia bilineata*** | kept separate, due to moderate frequency |

**Table A1: Categories used in the χ2-test with Monte Carlo simulation**

**Table A2: List of all mosquito genera identified across all study zones**

| **Location** | **Family** | **Genus** | **Number** |
| --- | --- | --- | --- |
| Sylvatic zone | Anophelinae | *Anopheles* | 17 |
|  | Culicinae | *Aedes* | 69 |
|  |  | *Coquillettidia* | 6 |
|  |  | *Culex* | 115 |
|  |  | *Eretmapodites* | 1403 |
|  |  | *Mansonia* | 110 |
|  |  | *Toxorhynchites* | 3 |
|  |  | *Uranotaenia* | 469 |
|  |  | Total | 2192 |
| Transition zone | Anophelinae | *Anopheles* | 17 |
|  | Culicinae | *Aedes* | 56 |
|  |  | *Coquillettidia* | 12 |
|  |  | *Culex* | 5 |
|  |  | *Eretmapodites* | 895 |
|  |  | *Mansonia* | 122 |
|  |  | *Toxorhynchites* | 1 |
|  |  | *Uranotaenia* | 77 |
|  |  | Total | 1185 |
| Urban zone | Anophelinae | *Anopheles* | 85 |
|  | Culicinae | *Aedes* | 179 |
|  |  | *Coquillettidia* | 6 |
|  |  | *Culex* | 108 |
|  |  | *Eretmapodites* | 679 |
|  |  | *Mansonia* | 80 |
|  |  | *Toxorhynchites* | 1 |
|  |  | *Uranotaenia* | 88 |
|  |  | Total | 1226 |
| Total |  |  | 4603 |

**Table A3: List of all mosquito species identified across all study zones**

| **Location** | **Family** | **Genus** | **Species** | **Number** |
| --- | --- | --- | --- | --- |
| Sylvatic Zone | Anophelinae | *Anopheles* | *Anopheles coustani* | 1 |
|  |  |  | *Anopheles gambiae* | 7 |
|  |  |  | *Anopheles paludis* | 2 |
|  |  |  | *Anopheles squamosus* | 1 |
|  |  |  | *Anopheles ziemani* | 5 |
|  | Culicinae | *Aedes* | *Aedes aegypti* | 8 |
|  |  | *Aedes* | *Aedes cumminsii* | 2 |
|  |  | *Aedes* | *Aedes dendrophilus* | 5 |
|  |  | *Aedes* | *Aedes grahami* | 1 |
|  |  | *Aedes* | *Aedes longipalpis* | 45 |
|  |  | *Aedes* | *Aedes palpalis* | 6 |
|  |  | *Coquillettidia* | *Coquillettidia aurites* | 6 |
|  |  | *Culex* | *Culex annulioris* | 4 |
|  |  | *Culex* | *Culex decens* | 101 |
|  |  | *Eretmapodites* | *Eretmapodites fraseri* | 998 |
|  |  | *Eretmapodites* | *Eretmapodites oedipodeios* | 1 |
|  |  | *Eretmapodites* | *Eretmapodites quinquevittatus* | 50 |
|  |  | *Mansonia* | *Mansonia africana* | 3 |
|  |  | *Mansonia* | *Mansonia uniformis* | 46 |
|  |  | *Uranotaenia* | *Uranotaenia bilineata* | 443 |
|  |  | Total |  | 1735 |
| Transition Zone | Anophelinae | *Anopheles* | *Anopheles gambiae* | 5 |
|  |  | *Anopheles* | *Anopheles paludis* | 7 |
|  |  | *Anopheles* | *Anopheles pharoensis* | 2 |
|  |  | *Anopheles* | *Anopheles squamosus* | 1 |
|  |  | *Anopheles* | *Anopheles ziemani* | 2 |
|  | Culicinae | *Aedes* | *Aedes aegypti* | 47 |
|  |  | *Aedes* | *Aedes furcifer* | 5 |
|  |  | *Aedes* | *Aedes longipalpis* | 4 |
|  |  | *Coquillettidia* | *Coquillettidia aurites* | 12 |
|  |  | *Eretmapodites* | *Eretmapodites fraseri* | 145 |
|  |  | *Eretmapodites* | *Eretmapodites quinquevittatus* | 285 |
|  |  | *Mansonia* | *Mansonia africana* | 1 |
|  |  | *Mansonia* | *Mansonia uniformis* | 40 |
|  |  | *Uranotaenia* | *Uranotaenia bilineata* | 33 |
|  |  | Total |  | 589 |
| Urban Zone | Anophelinae | *Anopheles* | *Anopheles gambiae* | 43 |
|  |  | *Anopheles* | *Anopheles paludis* | 32 |
|  |  | *Anopheles* | *Anopheles pharoensis* | 2 |
|  |  | *Anopheles* | *Anopheles squamosus* | 1 |
|  |  | *Anopheles* | *Anopheles ziemani* | 7 |
|  | Culicinae | *Aedes* | *Aedes aegypti* | 171 |
|  |  | *Aedes* | *Aedes cumminsii* | 2 |
|  |  | *Aedes* | *Aedes lilii* | 1 |
|  |  | *Aedes* | *Aedes longipalpis* | 1 |
|  |  | *Aedes* | *Aedes usambara* | 2 |
|  |  | *Aedes* | *Aedes vittatus* | 1 |
|  |  | *Coquillettidia* | *Coquillettidia aurites* | 5 |
|  |  | *Coquillettidia* | *Coquillettidia metallica* | 1 |
|  |  | *Culex* | *Culex decens* | 2 |
|  |  | *Culex* | *Culex nebulosis* | 4 |
|  |  | *Culex* | *Culex quinquefasciatus* | 94 |
|  |  | *Eretmapodites* | *Eretmapodites fraseri* | 234 |
|  |  | *Eretmapodites* | *Eretmapodites quinquevittatus* | 1 |
|  |  | *Mansonia* | *Mansonia africana* | 1 |
|  |  | *Mansonia* | *Mansonia metallica* | 1 |
|  |  | *Mansonia* | *Mansonia uniformis* | 17 |
|  |  | *Uranotaenia* | *Uranotaenia bilineata* | 2 |
|  |  | Total |  | 625 |
| Total |  |  |  | 2949 |

**Table A4: Total numbers (N), species abundance (F %) and relative abundance (C %) of Culicidae across the study zones**

|  | Sylvatic | | | Transition | | | Urban | | |
| --- | --- | --- | --- | --- | --- | --- | --- | --- | --- |
| N | F (%) | C (%) | N | F (%) | C (%) | N | F (%) | C (%) |
| *Aedes aegypti* | 8 | 0.46 | 15 | 47 | 7.98 | 47.5 | 171 | 27.36 | 77.5 |
| *Aedes cumminsii* | 2 | 0.12 | 5 | 0 | 0 | 0 | 2 | 0.32 | 2.5 |
| *Aedes dendrophilus* | 5 | 0.29 | 2.5 | 0 | 0 | 0 | 0 | 0 | 0 |
| *Aedes furcifer* | 0 | 0 | 0 | 5 | 0.85 | 5 | 0 | 0 | 0 |
| *Aedes grahami* | 1 | 0.06 | 2.5 | 0 | 0 | 0 | 0 | 0 | 0 |
| *Aedes lilii* | 0 | 0 | 0 | 0 | 0 | 0 | 1 | 0.16 | 2.5 |
| *Aedes longipalpis* | 45 | 2.59 | 35 | 4 | 0.68 | 7.5 | 1 | 0.16 | 2.5 |
| *Aedes palpalis* | 6 | 0.35 | 7.5 | 0 | 0 | 0 | 0 | 0 | 0 |
| *Aedes usambara* | 0 | 0 | 0 | 0 | 0 | 0 | 2 | 0.32 | 5 |
| *Aedes vittatus* | 0 | 0 | 0 | 0 | 0 | 0 | 1 | 0.16 | 2.5 |
| *Anopheles coustani* | 1 | 0.06 | 2.5 | 0 | 0 | 0 | 0 | 0 | 0 |
| *Anopheles gambiae* | 7 | 0.4 | 10 | 5 | 0.85 | 10 | 43 | 6.88 | 42.5 |
| *Anopheles paludis* | 2 | 0.12 | 5 | 7 | 1.19 | 12.5 | 32 | 5.12 | 30 |
| *Anopheles pharoensis* | 0 | 0 | 0 | 2 | 0.34 | 5 | 2 | 0.32 | 5 |
| *Anopheles squamosus* | 1 | 0.06 | 2.5 | 1 | 0.17 | 2.5 | 1 | 0.16 | 2.5 |
| *Anopheles ziemani* | 5 | 0.29 | 7.5 | 2 | 0.34 | 5 | 7 | 1.12 | 12.5 |
| *Coquillettidia aurites* | 6 | 0.35 | 7.5 | 12 | 2.04 | 22.5 | 5 | 0.8 | 7.5 |
| *Coquillettidia metallica* | 0 | 0 | 0 | 0 | 0 | 0 | 1 | 0.16 | 2.5 |
| *Culex annulioris* | 4 | 0.23 | 2.5 | 0 | 0 | 0 | 0 | 0 | 0 |
| *Culex decens* | 101 | 5.82 | 7.5 | 0 | 0 | 0 | 2 | 0.32 | 2.5 |
| *Culex nebulosis* | 0 | 0 | 0 | 0 | 0 | 0 | 4 | 0.64 | 7.5 |
| *Culex quinquefasciatus* | 0 | 0 | 0 | 0 | 0 | 0 | 94 | 15.04 | 15 |
| *Eretmapodites fraseri* | 998 | 57.52 | 87.5 | 145 | 24.62 | 75 | 234 | 37.44 | 85 |
| *Eretmapodites oedipodeios* | 1 | 0.06 | 2.5 | 0 | 0 | 0 | 0 | 0 | 0 |
| *Eretmapodites quinquevittatus* | 50 | 2.88 | 35 | 285 | 48.39 | 52.5 | 1 | 0.16 | 2.5 |
| *Mansonia africana* | 3 | 0.17 | 5 | 1 | 0.17 | 2.5 | 1 | 0.16 | 2.5 |
| *Mansonia metallica* | 0 | 0 | 0 | 0 | 0 | 0 | 1 | 0.16 | 2.5 |
| *Mansonia uniformis* | 46 | 2.65 | 35 | 40 | 6.79 | 42.5 | 17 | 2.72 | 27.5 |
| *Uranotaenia bilineata* | 443 | 25.53 | 85 | 33 | 5.6 | 35 | 2 | 0.32 | 5 |
